# Supplementary material
Source: MDPI journal article supplement (https://www.mdpi.com/2077-0472/11/1/41)
Supplement: s1 [file s1]

# Supplementary Materials:

The following tables are available online at <https://www.mdpi.com/2077-0472/11/1/41/s1>

Supplementary Table S1: Proportion of young DSN bulls assigned to carcass conformation classes and to carcass fat classes (EUROP system). Prices per kg for the respective carcass and fat classes stem from records of 711 young bulls. These prices are taken as the marginal revenue per kg of carcass in this study. Sub-groups (“+”, “0”, “-”) were not considered in this table. Young bulls of this study were not assigned to carcass class E and fat class 5.

| Carcass conformation      | E    | U     | R     | O     | P     |
|---------------------------|------|-------|-------|-------|-------|
| Proportion of animals (%) | 0.0  | 9.4   | 75.1  | 14.6  | 0.8   |
| Price per kg (EUR)        | 3.87 | 3.82  | 3.73  | 3.48  | 2.23  |
| Carcass fat class         | 1    | 2     | 3     | 4     | 5     |
| Proportion of animals (%) | 0.3  | 20.1  | 77.8  | 1.8   | 0.0   |
| Price per kg (EUR)        | 0.00 | -0.10 | -0.20 | -0.30 | -0.40 |

Example: marginal revenue for “R3” = 3.73 EUR – 0.20 EUR = 3.53 EUR

Supplementary Table S2: Biological and economical parameters included in the calculation of DSN Net Merit.

|            | Trait/Service                                                       | DSN value             |
|------------|---------------------------------------------------------------------|-----------------------|
| Biological | Functional herd life (fHL)                                          | 1,100 days            |
|            | Calving interval (CI)                                               | 387 days              |
|            | Days in milk (DIM)                                                  | 330 days              |
|            | Number of calves during fHL (CA)                                    | 3                     |
|            | Proportion of cows inseminated in their last lactation              | 75%                   |
|            | Still birth rate heifers/cows for both male and female calves (SBr) | 6.2 %                 |
|            | Still birth rate heifers/cows for male calves (SBrm)                | 8.8%                  |
| Economical | Marginal revenue per kg fat from milk                               | 3.73 EUR <sup>1</sup> |
|            | Marginal costs per kg fat from milk                                 | 1.19 EUR <sup>2</sup> |
|            | Marginal revenue per kg protein from milk                           | 5.60 EUR <sup>1</sup> |
|            | Marginal costs per kg protein from milk                             | 1.53 EUR <sup>2</sup> |
|            | Marginal costs per kg lactose from milk                             | 0.52 EUR <sup>2</sup> |
|            | Replacement costs per culled cow                                    | 698.23 EUR            |
|            | Price per calf (average of male and female)                         | 130.00 EUR            |
|            | Price per calf of loss until day 458 (Supplementary Table S5)       | 592.10 EUR            |
|            | Price per semen dose + service insemination                         | 10.00 EUR + 14.41 EUR |
|            | Marginal revenue young bull's carcass per kg "R3"                   | 3.53 EUR              |
|            | Marginal costs per day of fattening young bulls                     | 2.15 EUR <sup>3</sup> |

<sup>1</sup> Average milk price Friesland Campina, DMK, MUH-Arla for 1 kg milk (4.0% fat, 3.4% protein)  
 $\sim 3.73 \text{ EUR} * 0.04 + 5.60 \text{ EUR} * 0.034 = 0.34 \text{ EUR/kg milk}$

<sup>2</sup> Feeding costs result from 66% roughage and 34% concentrate intake and a surplus of 3.5% maintenance energy required per additional kg compared to Holstein cows.

<sup>3</sup> Feeding costs for fattening are calculated from the largest DSN farm and aligned to an experimental design from Dummerstorf, 2018 [20]

Supplementary Table S3: Equations for calculating marginal profit in Euro per SD ( $mp_{\sigma}$ ) corrected for lactation length (LE) and average number of lactations (LA) for absolute EBVs included in DSN Net Milk and DSN Net Beef.

| Description                       | Equation                                                                                                              |
|-----------------------------------|-----------------------------------------------------------------------------------------------------------------------|
| Factor for lactation length (LE)  | 330 d (DIM) / 305 d (standard lactation) = 1.08                                                                       |
| Average number of lactations (LA) | 1,100 d (fHL) / 387 d (CI) = 2.84                                                                                     |
| Number of male calves (mCA)       | 3 (CA) * (1 - 0.088) (SBrm) * 0.5 = 1.37                                                                              |
| Milk fat kg                       | 25.1 kg/SD <sub>Fat</sub> * 2.54 EUR/kg ( $mp_{\sigma}$ ) * 1.08 (LE) * 2.84 (LA) = 195.55 EUR/SD                     |
| Milk protein kg                   | 19.8 kg/SD <sub>Protein</sub> * 4.07 EUR/kg ( $mp_{\sigma}$ ) * 1.08 (LE) * 2.84 (LA) = 247.17 EUR/SD                 |
| Milk lactose kg                   | 33.1 kg/SD <sub>Lact</sub> * -0.52 EUR/kg ( $mp_{\sigma}$ ) * 1.08 (LE) * 2.84 (LA) = -52.79 EUR/SD                   |
| Carcass conformation, class "R3"  | 15 kg/SD <sub>eCW</sub> * 1.38 EUR/kg ( $mp_{\sigma}$ ) * 1.37 (mCA) = 28.32 EUR/SD                                   |
| Carcass fat class                 | 0.4 fat/SD <sub>carc_fat</sub> * 15 kg/SD <sub>eCW</sub> * -0.10 EUR/kg ( $mp_{\sigma}$ ) * 1.37 (mCA) = -0.82 EUR/SD |

Supplementary Table S4: Equations for calculating marginal profit in Euro per SD ( $mp_{\sigma}$ ) corrected for average number of calves (CA) for relative EBVs included in DSN Net Fitness.

| Description                                                | Equation                                                                                                                                                                                                             |
|------------------------------------------------------------|----------------------------------------------------------------------------------------------------------------------------------------------------------------------------------------------------------------------|
| Costs per additional day of calving interval (AdCI)        | 130.00 EUR (Price per calf) / 387 d (CI) = 0.34 EUR/d                                                                                                                                                                |
| Calving-to-first-Insemination (CFc)                        | 9.01 d/SD <sub>CFc</sub> * 0.34 EUR/d (AdCI) * (CA - 1) = 6.13 EUR/SD                                                                                                                                                |
| First-to-last heifers (FLh)                                | 6.21 d/SD <sub>FLh</sub> * (10 EUR + 14.41 EUR)/21 d * 1 = 7.20 EUR/SD                                                                                                                                               |
| First-to-last cows (FLc)                                   | 10.1 d/SD <sub>FLc</sub> * ((10 EUR + 14.41 EUR)/21 d + 0.34 EUR/d AdCI) * (CA - 1) = 30.30 EUR/SD<br>10.1 d/SD <sub>FLc</sub> * (10 EUR + 14.41 EUR)/21 d * 0.75 = 8.79 EUR/SD<br>FLc = 30.30 + 8.79 = 39.09 EUR/SD |
| Calf survival (RZcalfhealth)<br>see Supplementary Table S5 | 0.044 %/SD <sub>calf_survival</sub> * 592.10 EUR/calf * 3 (CA) * (1 - 0.062 SBr) = 73.33 EUR/SD                                                                                                                      |
| Still birth rate direct (SBd)                              | 0.024 %/SD <sub>SBd</sub> * 130.00 EUR (price per calf) * 3 (CA) = 9.36 EUR/SD                                                                                                                                       |
| Still birth rate maternal (SBm)                            | 0.031 %/SD <sub>SBm</sub> * 130.00 EUR (price per calf) * 3 (CA) = 12.09 EUR/SD                                                                                                                                      |
| Calving ease direct (CEd)                                  | 1.676 EUR/SD <sub>CEd</sub> * 3 (CA) = 5.03 EUR/SD                                                                                                                                                                   |
| Calving ease maternal (CEm)                                | 1.343 EUR/SD <sub>CEm</sub> * 3 (CA) = 4.03 EUR/SD                                                                                                                                                                   |
| Functional herd life (RZN)                                 | 698.23 EUR (replacement costs) / 1,100 d (fHL) = 0.63 EUR/d<br>258.7 d/SD <sub>RZN</sub> * 0.63 EUR/d = 164.21 EUR/SD                                                                                                |

Supplementary Table S5: Marginal costs for premature loss of female calves in the respective time interval to survive (days of age) (n = 2,578).

| Interval [d] | Mean age [d] | Proportion of premature loss [%] | Marginal costs per calf [EUR] | Marginal costs per interval [EUR] |
|--------------|--------------|----------------------------------|-------------------------------|-----------------------------------|
| 3-14         | 9.9          | 11                               | 179                           | 19.69                             |
| 15-60        | 31.1         | 27                               | 367                           | 99.09                             |
| 61-120       | 89.3         | 14                               | 485                           | 67.90                             |
| 121-200      | 157.1        | 18                               | 604                           | 108.72                            |
| 201-458      | 328.2        | 30                               | 989                           | 296.70                            |
| 3-458        | 144.2        | 100                              |                               | 592.10                            |
